# Supplementary material for: Large-Scale Mapping and Validation of Escherichia coli Transcriptional Regulation from a Compendium of Expression Profiles
Source: PLOS journal article supplement (doi:10.1371/journal.pbio.0050008), 2007-01-05
Supplement: S2 (10.1371/journal.pbio.0050008.s002) [file journal.pbio.0050008.s002]

**Table S2. Functional enrichment of YnaE targets.**

| **Functional category** | **Target Genes** | **p-value** |
| --- | --- | --- |
| response to temperature stimulus | cspI, cspG | 0.0004 |
| response to abiotic stimulus | cspI,cspG | 0.002 |
| response to stimulus | cspI,cspG | 0.0106 |
